# Supplementary material
Source: PubMed Central journal article supplement (PMC5812728)
Supplement: NIHMS940951-supplement-Supplemental_Info.pdf [file NIHMS940951-supplement-Supplemental_Info.pdf]

## Supporting Information

### Epigenetic DNA Modification *N*<sup>6</sup>-Methyladenine Causes Site-Specific RNA Polymerase II Transcriptional Pausing

Wei Wang<sup>†,#</sup>, Liang Xu<sup>†,□,#</sup>, Lulu Hu<sup>§</sup>, Jenny Chong<sup>†</sup>, Chuan He<sup>§</sup> and Dong Wang<sup>†,‡,\*</sup>

<sup>†</sup> Division of Pharmaceutical Sciences, Skaggs School of Pharmacy & Pharmaceutical Sciences and <sup>‡</sup> Department of Cellular & Molecular Medicine, School of Medicine, University of California, San Diego, La Jolla, CA 92093-0625, USA.

<sup>§</sup> Department of Chemistry and Institute for Biophysical Dynamics, Howard Hughes Medical Institute, The University of Chicago, Chicago, IL 60637, USA.

<sup>□</sup> Department of Chemistry, Sun Yat-Sen University, Guangzhou, China.

**Key words:** *Transcription, Epigenetics, DNA methylation, N<sup>6</sup>-methyladenine, RNA Polymerase II.*

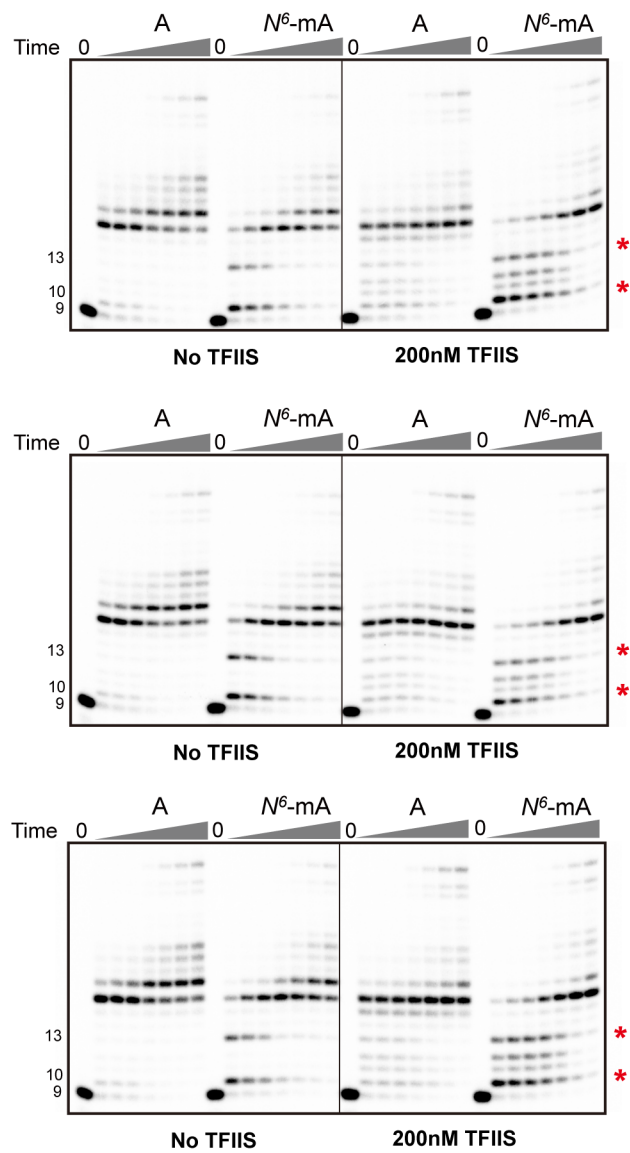

**Figure S1.**  $N^6$ -mA causes site-specific pol II pausing due to a slow incorporation step. Three additional repeats for Figure 1c and 1d.

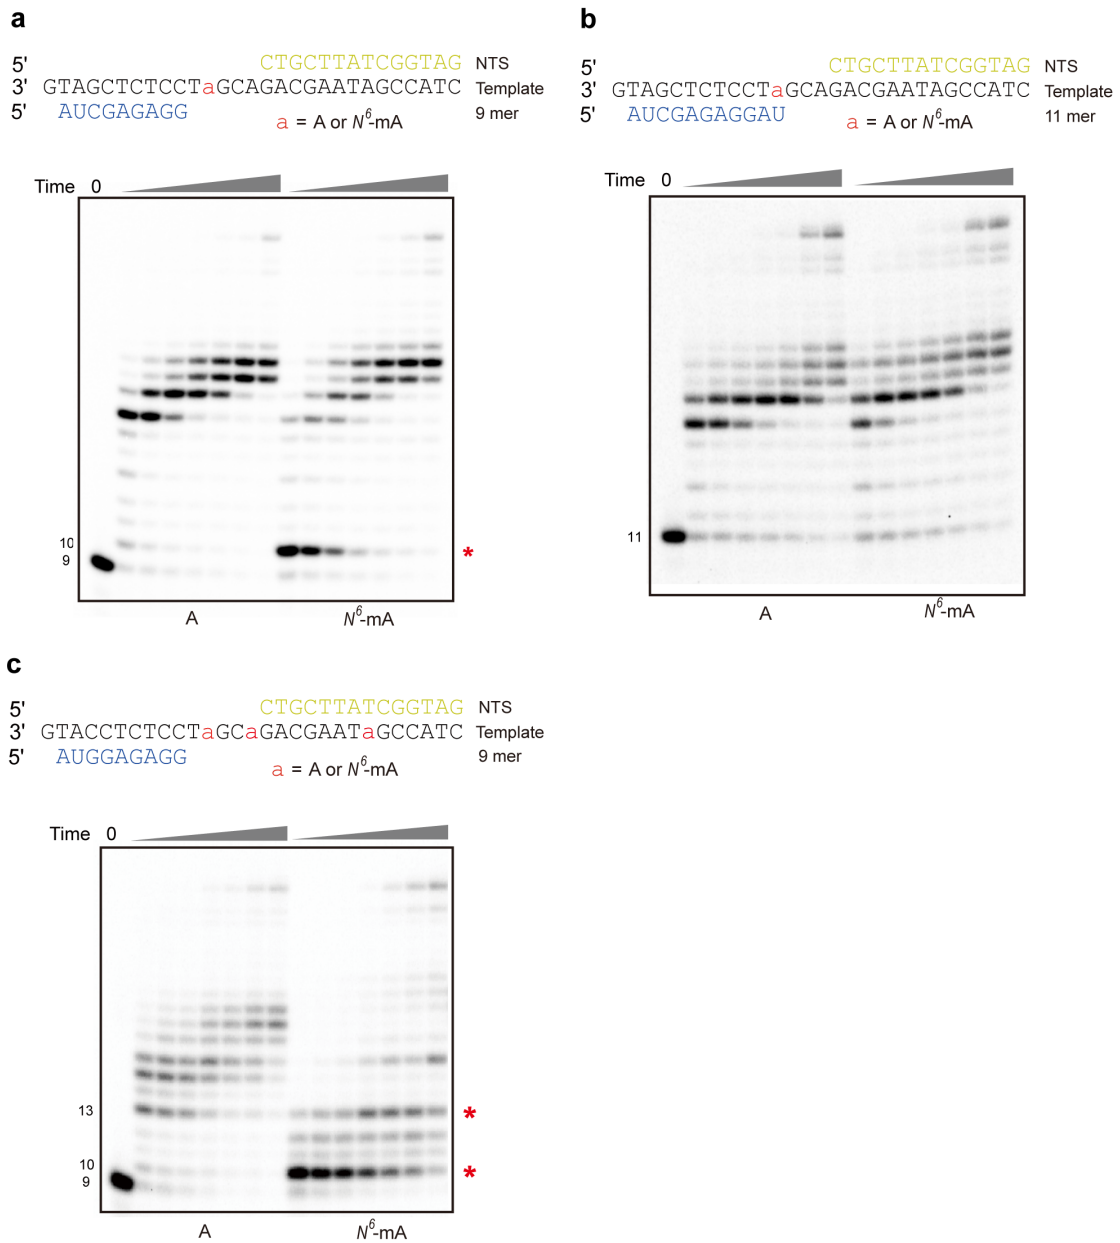

**Figure S2.**  $N^6$ -mA causes site-specific pol II pausing due to a slow incorporation step. (a) Gel analysis of nucleotide incorporation against  $N^6$ -mA, and (b) subsequent extension after  $N^6$ -mA in the presence of 25  $\mu$ M NTP. Time points are 0s, 15 s, 30 s, 1 min, 2 min, 5 min, 20 min, and 1 hr, respectively. (c)  $N^6$ -mA cause site-specific pol II pausing (highlighted with \*) in the presence of 1  $\mu$ M TFIIS.

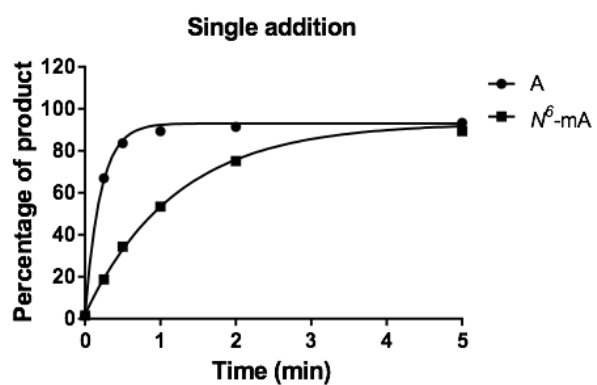

**Figure S3.** Quantitative analysis of observed kinetic rates for single UMP incorporation. For the unmodified template,  $k_{\text{obs,A}}=4.8 \pm 0.3 \text{ min}^{-1}$ ; for the  $N^6$ -mA,  $k_{\text{obs,mA}}=0.83 \pm 0.04 \text{ min}^{-1}$ .

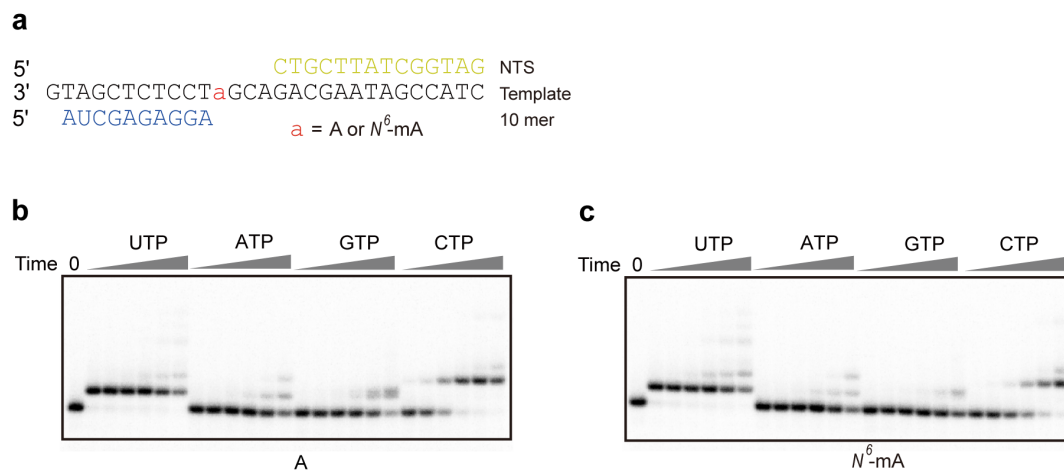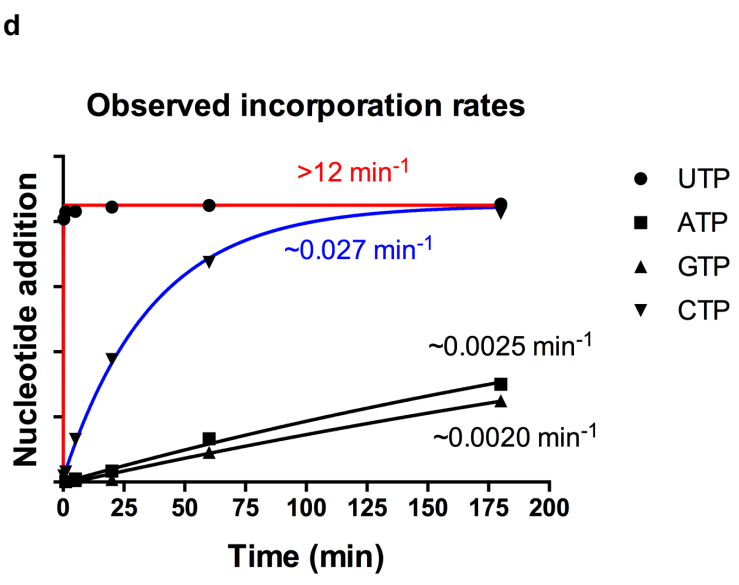

**Figure S4.** UMP is selectively incorporated opposite the  $N^6$ -mA site. (a) RNA/DNA scaffold used in this *in vitro* transcription assay. Single nucleotide addition for the unmodified template (b) and  $N^6$ -mA template (c). The nucleotide concentration is 1 mM. The first lane in the left refers to time zero. Other time points are 0, 15 s, 1 min, 5 min, 20 min, 1 hr, and 3 hr, respectively. (d) Quantitative analysis of nucleotide incorporation opposite of  $N^6$ -mA template.

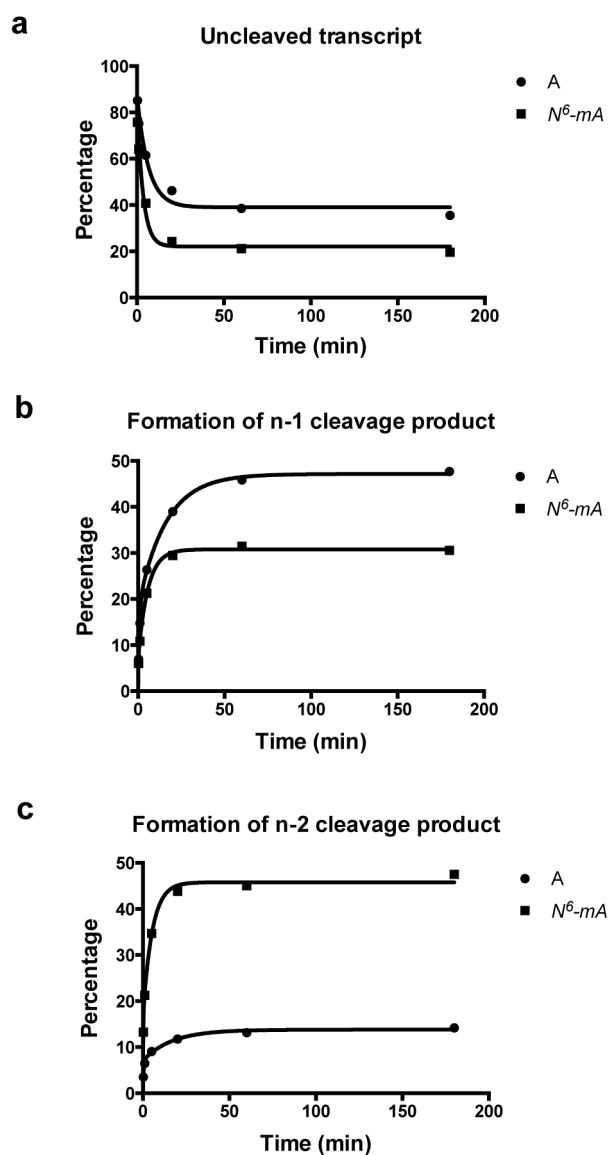

**Figure S5.** Analysis of TFIIS-stimulated transcript cleavage rates and patterns in the unmodified A template and  $N^6$ -mA template. (a) Quantitative analysis of overall observed transcript cleavage rates derived by the disappearance of starting material using two-phase decay fitting model.  $k_{\text{obs},6\text{mA}} = 4.9 \pm 1.9 \text{ min}^{-1}$  for  $N^6$ -mA template and  $k_{\text{obs},A} = 1.2 \pm 0.3 \text{ min}^{-1}$  for unmodified template. (b) Formation of n-1 cleavage product (pre-translocation state derived cleavage) using two-phase decay fitting model.  $k_{\text{obs},6\text{mA}} = 4.8 \pm 2.0 \text{ min}^{-1}$  for  $N^6$ -mA template and  $k_{\text{obs},A} = 1.3 \pm 0.3 \text{ min}^{-1}$  for unmodified template. Population of pre-translocation derived by curve plateau are  $31 \pm 1\%$  for the  $N^6$ -mA template and  $47 \pm 1\%$  for the unmodified A template. (c) Formation of n-2 cleavage product (backtracked state derived cleavage) using

two-phase decay fitting model.  $k_{\text{obs},6\text{mA}} = 5 \pm 2 \text{ min}^{-1}$  for  $N^6$ -mA template and  $k_{\text{obs},A} = 2.4 \pm 0.8 \text{ min}^{-1}$  for unmodified template. Population of backtracked state derived by curve plateau are  $46 \pm 1\%$  for the  $N^6$ -mA template and  $14 \pm 0.4\%$  for the unmodified A template.

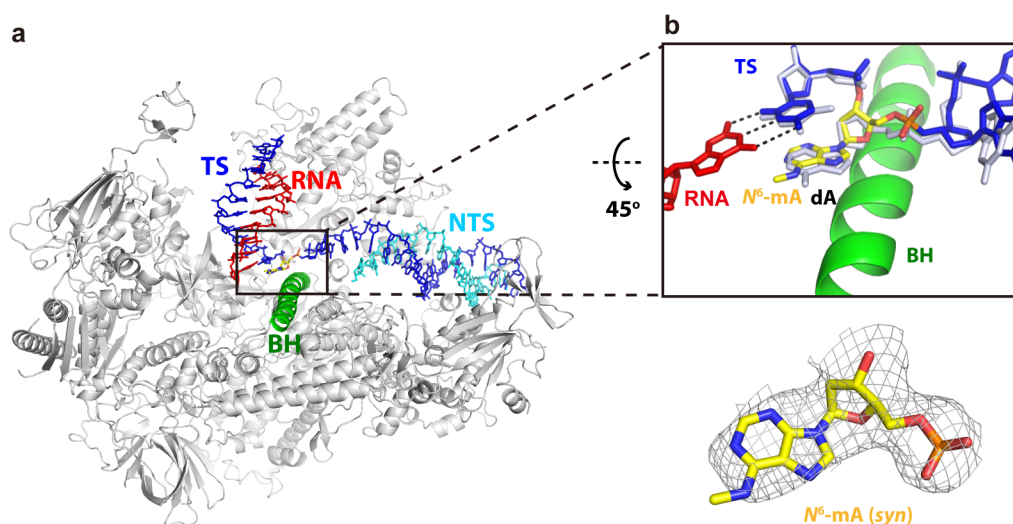

**Figure S6.** Crystal structure of RNA pol II elongation complex with an  $N^6$ -mA at  $i+1$  position (EC-I). (a) Overall structure of pol II EC. All representations and colors are the same as pol II EC-II in Figure 3. (b) Comparison of  $N^6$ -mA with the corresponding canonical template nucleotide (silver colored, PDB code 2NVZ). Bottom panel:  $2F_o - F_c$  map (grey) of  $N^6$ -mA is contoured at  $1.0\sigma$ .

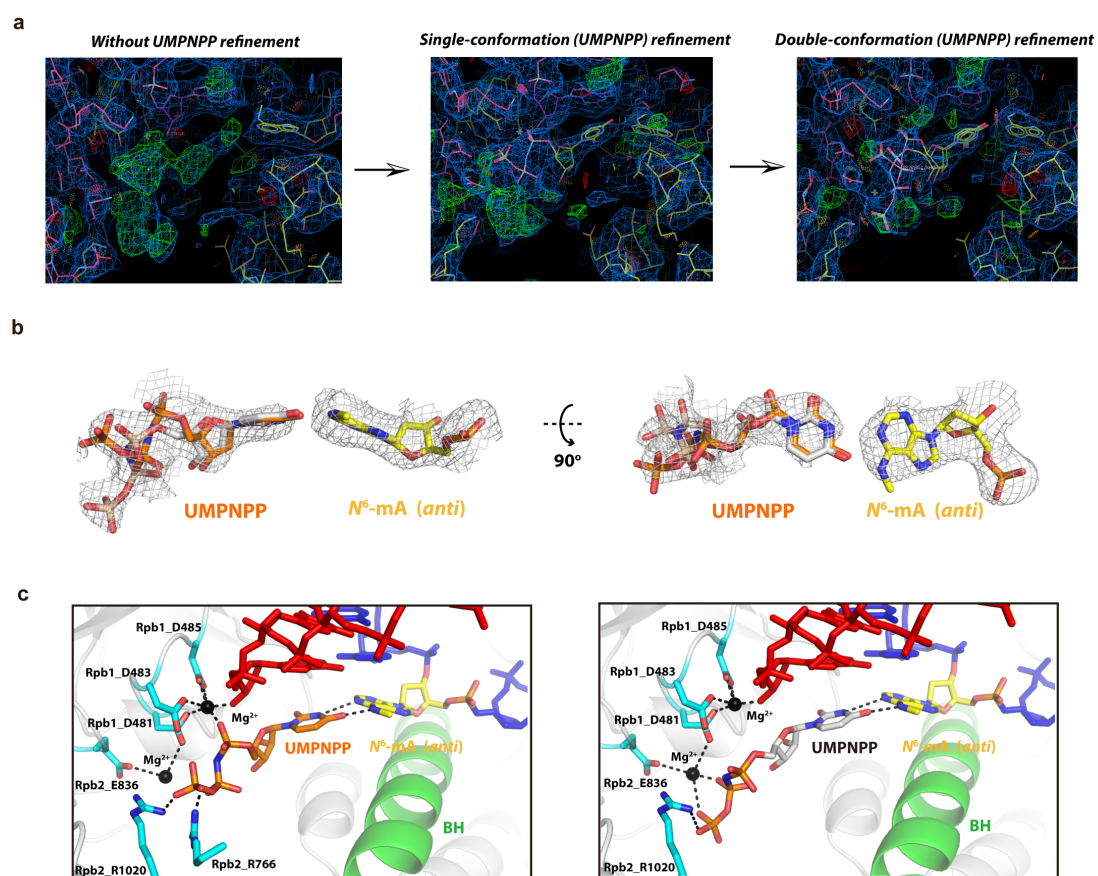

**Figure S7.** Electron density maps of pol II EC-II and two conformations of UMPNPP. (a) The original refinement process of UMPNPP is shown in software of COOT.  $2Fo-Fc$  map is colored as blue ( $1.0\sigma$ ), and  $Fo-Fc$  map is colored as green ( $3.0\sigma$ ). (b)  $2Fo-Fc$  maps (grey) of UMPNPP and  $N^6$ -mA are contoured at  $1.0\sigma$  from two views. Two conformations of UMPNPP are colored as white and orange sticks, respectively. (c) Interaction network of hydrogen bonds between two different conformations of UMPNPP and  $N^6$ -mA.



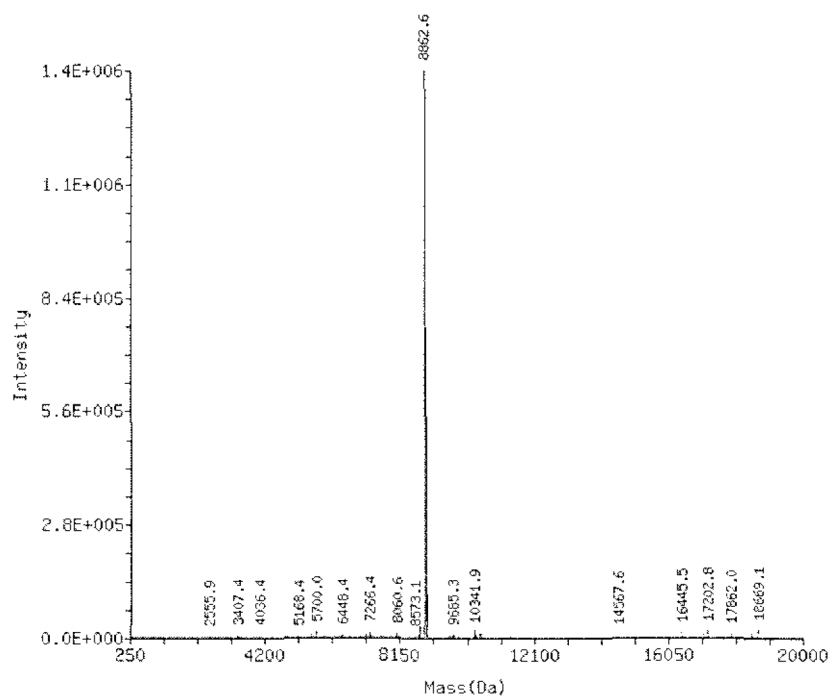

**Figure S8.** Representative deconvoluted ESI mass spectrum characterization of synthetic  $N^6$ -mA containing DNA oligo. The sequence is 5' CTACCGATAAGCAGACG( $N^6$ -mA)TCCTCTCGATG 3'. The theoretical molecular weight is 8860.8 Da.

**Table S1.** X-ray Diffraction Data and Refinement Statistics.

|                                    | <b>EC-I</b>         | <b>EC-II</b>        |
|------------------------------------|---------------------|---------------------|
| <b>Data collection</b>             |                     |                     |
| Space group                        | C2                  | C2                  |
| Cell dimensions                    |                     |                     |
| a, b, c (Å)                        | 167.2, 222.0, 192.7 | 168.7, 224.0, 193.1 |
| $\alpha$ , $\beta$ , $\gamma$ (°)  | 90, 100.6, 90       | 90, 101.0, 90       |
| Resolution (Å)                     | 95.8-3.6 (3.67-3.6) | 96.4-3.4 (3.58-3.4) |
| Mean I/ $\sigma$                   | 5.0 (1.3)           | 5.5 (1.3)           |
| CC 1/2                             | 0.98 (0.53)         | 0.98 (0.47)         |
| Completeness (%)                   | 100 (100)           | 99.6 (99.8)         |
| Redundancy                         | 5.4 (5.4)           | 3.7 (3.7)           |
| <b>Refinement</b>                  |                     |                     |
| Resolution (Å)                     | 81.0-3.6            | 82.8-3.4            |
| Diffraction Anisotropy a, b, c (Å) | 4.0, 3.6, 3.6       | 3.7, 3.4, 3.4       |
| No. reflections                    | 71390               | 83721               |
| $R_{\text{work}}/R_{\text{free}}$  | 0.227/0.259         | 0.227/0.254         |
| RMSD bands                         | 0.002               | 0.002               |
| RMSD angles                        | 0.514               | 0.536               |
| Ramachandran favored (%)           | 92.5                | 92.6                |
